# Supplementary material for: An RCT on 12 weeks of cognitive, motor or combined cognitive-motor exercise to improve dual-task walking in older adults: The role of baseline cognitive and motor fitness
Source: Research Square preprint supplement (doi:10.21203/rs.3.rs-6185287/v1), 2025-03-20
Supplement: Supplementary file 1 [file 4c39b19d8cbdc2b97c687f9c.docx]

**Supplements**

**Serial Threes**

**Data preparation (baseline cognitive and motor fitness) for final analysis**

**Table 1**
Linear regression results for cognitive fitness (cf)

| **Predictor** | **Est** | **SE** | **t** | **p** |
| --- | --- | --- | --- | --- |
| Intercept | 236.502 | 150.819 | 1.57 | .121 |
| Age | -3.408 | 2.206 | -1.54 | .127 |
| Sex (female) | -41.645 | 14.775 | -2.82 | .006 |
| Education | 1.313 | 2.656 | 0.49 | .623 |
| Mf | -0.075 | 0.119 | -0.63 | .530 |

*Note.* Residual standard error = 62.1; Adjusted R² = 0.062; F(4, 75) = 2.30, p = .067.

**Table 2**
Linear regression results for motor fitness (mf)

| **Predictor** | **Est** | **SE** | **t** | **p** |
| --- | --- | --- | --- | --- |
| Intercept | 330.702 | 143.556 | 2.30 | .024 |
| Age | -4.625 | 2.106 | -2.20 | .031 |
| Sex (female) | -31.861 | 14.602 | -2.18 | .032 |
| Education | 0.589 | 2.578 | 0.23 | .820 |
| Cf | -0.070 | 0.112 | -0.63 | .530 |

*Note.* Residual standard error = 60.2; Adjusted R² = 0.047; F(4, 75) = 1.98, p = .106.

**Intervention effects – parsimonious model selection**

**Models**

Model m0_S3: cognitive-motor performance ~ 1 + time * group * domain * condition + (1 + time + domain + condition | Subj)

Model m0a_S3: cognitive-motor performance ~ 1 + time * group * domain + condition + condition : domain + (1 + time + domain + condition | Subj)

**Table 3**
Comparison of Model Fit Indices m0_S3 vs m0a_S3

| **Model** | **Parameters (npar)** | **AIC** | **BIC** | **Log-Likelihood (logLik)** | **Deviance** | **χ² (Chisq)** | **df** | **p** |
| --- | --- | --- | --- | --- | --- | --- | --- | --- |
| m0a_S3 | 25 | 7564 | 7718 | -3757 | 7514 |  |  |  |
| m0_S3 | 35 | 7573 | 7789 | -3751 | 7503 | 11.01 | 10 | 0.357 |

**Moderation effects – parsimonious model selection**

**Models**

Model m0_S3: cognitive-motor performance ~ 1 + time * group * domain * condition + (1 + time + domain + condition | Subj)

Model m1_S3: cognitive-motor performance ~ 1 + time * group * domain * condition * (cf1 + mf1) + (1 + time + domain + condition | Subj)

Model m1a_S3: cognitive-motor performance ~ 1 + time * group * domain * (cf1 + mf1) + condition + condition: domain + (1 + time + domain + condition | Subj)

Model m1a_cf_S3: cognitive-motor performance ~ 1 + time* group * domain * cf1 + condition + condition : domain + (1 + time + domain + condition | Subj)

Model m1a_mf_S3: cognitive-motor performance ~ 1 + time* group * domain * mf1 + condition + condition : domain + (1 + time + domain + condition | Subj)

Model m1a_cfxmf_S3: cognitive-motor performance ~ 1 + time* group * domain * (cf1 * mf1) + condition + condition : domain + (1 + time + domain + condition | Subj)

**Table 4**
Comparison of Model Fit Indices m0_S3 vs m1_S3

| **Model** | **Parameters (npar)** | **AIC** | **BIC** | **Log-Likelihood (logLik)** | **Deviance** | **χ² (Chisq)** | **df** | **p** |
| --- | --- | --- | --- | --- | --- | --- | --- | --- |
| m0_S3 | 35 | 7573 | 7789 | -3751 | 7503 |  |  |  |
| m1_S3 | 83 | 7568 | 8082 | -3701 | 7402 | 100.6 | 48 | < .001 *** |

- Cf and/or mf fitness improve model fit

**Table 5**
Comparison of Model Fit Indices m1_S3 vs m1a_S3

| **Model** | **Parameters (npar)** | **AIC** | **BIC** | **Log-Likelihood (logLik)** | **Deviance** | **χ² (Chisq)** | **df** | **p** |
| --- | --- | --- | --- | --- | --- | --- | --- | --- |
| m1a_S3 | 49 | 7536 | 7839 | -3719 | 7438 |  |  |  |
| m1_S3 | 83 | 7568 | 8082 | -3701 | 7402 | 35.91 | 34 | 0.379 |

- Excluding condition from the interaction with time x group x domain come does not decrease model fit

**Table 6**
Comparison of Model Fit Indices m1a_S3 vs m1a_cf_S3

| **Model** | **Parameters (npar)** | **AIC** | **BIC** | **Log-Likelihood (logLik)** | **Deviance** | **χ² (Chisq)** | **df** | **p** |
| --- | --- | --- | --- | --- | --- | --- | --- | --- |
| m1a_cf_S3 | 37 | 7529 | 7758 | -3727 | 7455 |  |  |  |
| m1a_S3 | 49 | 7536 | 7839 | -3719 | 7438 | 16.89 | 12 | 0.154 |

- Excluding mf does not decrease model fit

**Table 7**
Comparison of Model Fit Indices m1a_S3 vs m1a_mf_S3

| **Model** | **Parameters (npar)** | **AIC** | **BIC** | **Log-Likelihood (logLik)** | **Deviance** | **χ² (Chisq)** | **df** | **p** |
| --- | --- | --- | --- | --- | --- | --- | --- | --- |
| m1a_mf_S3 | 37 | 7566 | 7795 | -3746 | 7492 |  |  |  |
| m1a_S3 | 49 | 7536 | 7839 | -3719 | 7438 | 53.58 | 12 | < .001 *** |

- Excluding cf decrease model fit

**Table 8**
Comparison of Model Fit Indices m1a_S3 vs m1a_cfxmf_S3

| **Model** | **Parameters (npar)** | **AIC** | **BIC** | **Log-Likelihood (logLik)** | **Deviance** | **χ² (Chisq)** | **df** | **p** |
| --- | --- | --- | --- | --- | --- | --- | --- | --- |
| m1a_S3 | 49 | 7536 | 7839 | -3719 | 7438 |  |  |  |
| m1a_cfxmf_S3 | 61 | 7542 | 7920 | -3710 | 7420 | 17.66 | 12 | 0.126 |

- Adding an interaction term between cf and mf does not improve model fit

**Stroop**

**Data preparation for final analysis**

**Table 9**
Linear regression results for cognitive fitness (cf)

| **Predictor** | **Est** | **SE** | **t** | **p** |
| --- | --- | --- | --- | --- |
| Intercept | 224.460 | 155.064 | 1.45 | .152 |
| Age | -3.265 | 2.254 | -1.45 | .152 |
| Sex (female) | -41.703 | 15.019 | -2.78 | .007 ** |
| Education | 1.488 | 2.724 | 0.55 | .587 |
| Mf | -0.076 | 0.120 | -0.64 | .527 |

Note: Residual standard error = 62.8; Adjusted R² = 0.060; F(4, 73) = 2.23, p = .0745. Significant effects are indicated as follows: **p < .01; *p < .05.

**Table 10**
Linear regression results for motor fitness (mf)

| **Predictor** | **Est** | **SE** | **t** | **p** |
| --- | --- | --- | --- | --- |
| Intercept | 332.639 | 147.528 | 2.25 | .027 * |
| Age | -4.639 | 2.150 | -2.16 | .034 * |
| Sex (Female) | -31.311 | 14.876 | -2.10 | .039 * |
| Education | 0.531 | 2.648 | 0.20 | .842 |
| Cf | -0.072 | 0.113 | -0.64 | .527 |

Note: Residual standard error = 60.9; Adjusted R² = 0.045; F(4, 73) = 1.90, p = .12. Significant effects are indicated as follows: **p < .01; *p < .05.

**Intervention effects – parsimonious model selection**

**Models**

Model m0_STR: cognitive-motor performance ~ 1 + time * group * domain * condition + (1 + time + domain + condition | Subj)

Model m0a_STR: cognitive-motor performance ~ 1 + time * group * domain + condition + condition: domain + (1 + time + domain + condition | Subj)

**Table 11**
Comparison of Model Fit Indices m0_STR vs m0a_STR

| **Model** | **Parameters (npar)** | **AIC** | **BIC** | **Log-Likelihood (logLik)** | **Deviance** | **χ² (Chisq)** | **df** | **p** |
| --- | --- | --- | --- | --- | --- | --- | --- | --- |
| m0a_STR | 25 | 5464 | 5607 | -2707 | 5414 |  |  |  |
| m0_STR | 35 | 5478 | 5678 | -2704 | 5408 | 5.955 | 10 | 0.819 |

**Moderation effects – parsimonious model selection**

**Models**

Model m0_STR: cognitive-motor performance ~ 1 + time * group * domain * condition + (1 + time + domain + condition | Subj)

Model m1_STR: cognitive-motor performance ~ 1 + time * group * domain * condition * (cf1 + mf1) + (1 + time + domain + condition | Subj)

Model m1a_STR: cognitive-motor performance ~ 1 + time * group * domain * (cf1 + mf1) + condition + condition: domain + (1 + time + domain + condition | Subj)

Model m1a_cf_STR: cognitive-motor performance ~ 1 + time* group * domain * cf1 + condition + condition: domain + (1 + time + domain + condition | Subj)

Model m1a_mf_STR: cognitive-motor performance ~ 1 + time* group * domain *mf1 + condition + condition: domain +(1 + time + domain + condition | Subj)

Model m1a_cfxmf_STR: cognitive-motor performance ~ 1 + time* group * domain * (cf1 * mf1) + condition + condition: domain + (1 + time + domain + condition | Subj)

**Table 12**
Comparison of Model Fit Indices m0_STR vs m1_STR

| **Model** | **Parameters (npar)** | **AIC** | **BIC** | **Log-Likelihood (logLik)** | **Deviance** | **χ² (Chisq)** | **df** | **p** |
| --- | --- | --- | --- | --- | --- | --- | --- | --- |
| m0_STR | 35 | 5478 | 5678 | -2704 | 5408 |  |  |  |
| m1_STR | 83 | 5525 | 5998 | -2680 | 5359 | 49.48 | 48 | .414 |

- Cf and/or mf fitness does not improve model fit

**Table 13**
Comparison of Model Fit Indices m1_STR vs m1a_STR

| **Model** | **Parameters (npar)** | **AIC** | **BIC** | **Log-Likelihood (logLik)** | **Deviance** | **χ² (Chisq)** | **df** | **p** |
| --- | --- | --- | --- | --- | --- | --- | --- | --- |
| m1a_STR | 49 | 5489 | 5768 | -2696 | 5391 |  |  |  |
| m1_STR | 83 | 5525 | 5359 | -2680 | 5359 | 32.31 | 34 | .551 |

- Excluding condition from the interaction with time x group x domain come does not decrease model fit

**Table 14**
Comparison of Model Fit Indices m1a_STR vs m1a_cf_STR

| **Model** | **Parameters (npar)** | **AIC** | **BIC** | **Log-Likelihood (logLik)** | **Deviance** | **χ² (Chisq)** | **df** | **p** |
| --- | --- | --- | --- | --- | --- | --- | --- | --- |
| m1a_cf_STR | 37 | 5471 | 5682 | -2699 | 5397 |  |  |  |
| m1a_STR | 49 | 5489 | 5768 | -2696 | 5391 | 5.906 | 12 | .921 |

- Excluding mf does not decrease model fit

**Table 15**
Comparison of Model Fit Indices m1a_STR vs m1a_mf_STR

| **Model** | **Parameters (npar)** | **AIC** | **BIC** | **Log-Likelihood (logLik)** | **Deviance** | **χ² (Chisq)** | **df** | **p** |
| --- | --- | --- | --- | --- | --- | --- | --- | --- |
| m1a_mf_STR | 37 | 5482 | 5692 | -2704 | 5408 |  |  |  |
| m1a_STR | 49 | 5489 | 5768 | -2694 | 5391 | 16.42 | 12 | .173 |

- Excluding cf does not decrease model fit

**Table 16**
Comparison of Model Fit Indices m1a_STR vs m1a_cfxmf_STR

| **Model** | **Parameters (npar)** | **AIC** | **BIC** | **Log-Likelihood (logLik)** | **Deviance** | **χ² (Chisq)** | **df** | **p** |
| --- | --- | --- | --- | --- | --- | --- | --- | --- |
| m1a_STR | 49 | 5489 | 5768 | -2696 | 5391 |  |  |  |
| m1a_cfxmf_STR | 61 | 5503 | 5850 | -2690 | 5381 | 10.68 | 12 | .557 |

- Adding an interaction term between cf and mf does not improve model fit

**Table 17**

Mean and SD of cognitive and motor performance for the Serial Threea task and the Stroop task during ST and DT conditions at pre- and post-test

|  | **cogT** | | **motT** | | **DTT** | |
| --- | --- | --- | --- | --- | --- | --- |
|  | **pre** | **post** | **pre** | **post** | **pre** | **post** |
|  | **M ± SD** | **M ± SD** | **M ± SD** | **M ± SD** | **M ± SD** | **M ± SD** |
| **S3cog - ST** | 16.78 ± 4.99 | 17.51 ± 4.92 | 17.28 ± 4.47 | 18.42 ± 5.66 | 16.86 ± 4.47 | 17.98 ± 5.22 |
| **S3cog - DT** | 15.20 ± 4.68 | 16.11 ± 4.42 | 15.60 ± 4.73 | 16.71 ± 5.28 | 14.89 ± 4.31 | 16.45 ± 4.50 |
| **S3gait - ST** | 27.55 ± 11.50 | 27.77 ± 9.61 | 29.78 ± 9.79 | 28.32 ± 10.36 | 27.11 ± 9.24 | 26.89 ± 9.30 |
| **S3gait - DT** | 25.80 ± 11.67 | 27.42 ± 10.73 | 29.42 ± 10.07 | 28.14 ± 12.42 | 26.97 ± 8.95 | 28.01 ± 10.85 |
| **STRcog - ST** | 26.64 ± 20.72 | 21.70 ± 12.98 | 24.32 ± 22.70 | 23.01 ± 22.95 | 28.69 ± 21.38 | 17.52 ± 17.52 |
| **STRcog - DT** | 30.93 ± 17.08 | 21.95 ± 11.79 | 26.74 ± 23.10 | 26.70 ± 16.77 | 27.85 ± 20.11 | 21.18 ± 19.18 |
| **STRgait - ST** | 25.53 ± 9.80 | 26.04 ± 8.79 | 29.73 ± 10.17 | 28.72 ± 10.33 | 26.94 ± 9.95 | 26.19 ± 9.59 |
| **STRgait - DT** | 25.04 ± 11.11 | 24.70 ± 8.78 | 29.43 ± 10.29 | 28.45 ± 12.51 | 26.26 ± 9.20 | 27.01 ± 11.17 |
